# Supplementary material for: Benchmarking protein sequence and structure search methods for remote homology detection
Source: Research Square preprint supplement (doi:10.21203/rs.3.rs-8796067/v1), 2026-02-24
Supplement: Supplementary file 1 [file d34b461021c58ddeab4d6b27.docx]

**Supporting Information**

Benchmarking protein sequence and structure search methods for remote homology detection

Yuan Liu1, Yingquan Zhou1, Yan Huang2, Hongyi Xin3, Xiaoyong Pan1, Hong-Bin Shen1, *

1 Institute of Image Processing and Pattern Recognition, Shanghai Jiao Tong University, and Key Laboratory of System Control and Information Processing, Ministry of Education of China, Shanghai, 200240, China

2 State Key Laboratory of Infrared Physics, Shanghai Institute of Technical Physics, Chinese Academy of Sciences, 500 Yu Tian Road, Shanghai 200083, China

3 Global Institute of Future Technology, Shanghai Jiao Tong University, Shanghai, 200240, China

* Address correspondence to H.B. Shen at hbshen@sjtu.edu.cn

Tel: +86-21-34205320

Fax: +86-21-34204022

Contents

**Supplementary Tables** 3

**Table S1**. Area under curve of CATH hierarchy classification in Figure 23

**Table S2**. Mean GO semantic similarity of the top-10 retrieved hits for each method in Figure 3. 4

**Table S3.** Mean lDDT scores of the top-10 retrieved hits in Fig. 4 for multi-domain and corresponding single-domain proteins 5

**Table S4.** Mean GO semantic similarity of the top-10 retrieved hits for intrinsically disordered proteins across disorder content bins in Figure 5 6

**Table S5.** Mean GO semantic similarity of the top-10 retrieved hits across AlphaFold predicted structures stratified by pLDDT confidence levels, corresponding to Figure 67

**Supplementary Figures** 8

**Figure S1**. Pairwise comparison of residue-level alignment quality using lDDT8

**Figure S2**. Distribution of intrinsic disorder content and predicted structure confidence for the DisProt benchmark dataset9

**Supplementary Tables**

**Table S1.** Area under curve of CATH hierarchy classification in Figure 2.

| Method | Class | Architecture | Topology | Homologous superfamily |
| --- | --- | --- | --- | --- |
| GTalign | 1.73E-02 | 0.0608 | 0.282 | 0.5080 |
| TMalign | 1.69E-02 | 0.0630 | 0.2854 | 0.5109 |
| Dali | 2.47E-02 | 0.0588 | 0.2763 | 0.5027 |
| Foldseek | 1.36E-02 | 0.0355 | 0.2212 | 0.4625 |
| GraSR | 1.28E-02 | 0.0452 | 0.2019 | 0.3561 |
| TMvec | 7.51E-03 | 0.0253 | 0.1568 | 0.3001 |
| PLMSearch | 7.07E-03 | 0.0326 | 0.2154 | 0.4033 |
| DHR | 3.41E-03 | 0.0206 | 0.1424 | 0.3317 |
| FoldExplorer | 8.69E-03 | 0.0400 | 0.2259 | 0.4517 |
| BLAST | 3.53E-04 | 0.0025 | 0.0402 | 0.1100 |
| Diamond | 2.93E-05 | 0.0002 | 0.0066 | 0.0194 |
| jackhmmer | 4.12E-04 | 0.0049 | 0.0524 | 0.1405 |
| MMseqs | 3.22E-04 | 0.0024 | 0.0341 | 0.0940 |

**Table S2.** Mean GO semantic similarity of the top-10 retrieved hits for each method in Figure 3.

| Method | Mean GO semantic similarity |
| --- | --- |
| GTalign | 0.497 |
| TMalign | 0.515 |
| Dali | 0.553 |
| Foldseek | 0.551 |
| GraSR | 0.468 |
| TMvec | 0.516 |
| PLMSearch | 0.513 |
| DHR | 0.550 |
| FoldExplorer | 0.539 |
| BLAST | 0.424 |
| Diamond | 0.268 |
| jackhmmer | 0.438 |
| MMseqs | 0.390 |

**Table S3.** Mean lDDT scores of the top-10 retrieved hits in Fig. 4 for multi-domain and corresponding single-domain proteins.

| Method | Multi-domain mean lDDT | Single-domain mean lDDT |
| --- | --- | --- |
| GTalign | 0.507 | 0.549 |
| TMalign | 0.508 | 0.548 |
| Dali | 0.556 | 0.604 |
| Foldseek | 0.531 | 0.568 |
| GraSR | 0.417 | 0.551 |
| TMvec | 0.463 | 0.522 |
| PLMSearch | 0.483 | 0.523 |
| DHR | 0.475 | 0.494 |
| FoldExplorer | 0.473 | 0.549 |
| BLAST | 0.397 | 0.417 |
| Diamond | 0.298 | 0.352 |
| jackhmmer | 0.404 | 0.404 |
| MMseqs | 0.376 | 0.398 |

**Table S4.** Mean GO semantic similarity of the top-10 retrieved hits for intrinsically disordered proteins across disorder content bins in Figure 5.

| Method |  |  | bin |  |  |
| --- | --- | --- | --- | --- | --- |
| 0-0.2 | 0.2-0.4 | 0.4-0.6 | 0.6-0.8 | 0.8-1 |
| GTalign | 0.390 | 0.407 | 0.387 | 0.434 | 0.383 |
| TMalign | 0.394 | 0.418 | 0.399 | 0.453 | 0.384 |
| Dali | 0.430 | 0.443 | 0.419 | 0.457 | 0.397 |
| Foldseek | 0.423 | 0.445 | 0.428 | 0.453 | 0.413 |
| GraSR | 0.396 | 0.419 | 0.386 | 0.407 | 0.393 |
| TMvec | 0.421 | 0.444 | 0.403 | 0.458 | 0.399 |
| PLMSearch | 0.406 | 0.451 | 0.411 | 0.469 | 0.416 |
| DHR | 0.429 | 0.440 | 0.435 | 0.465 | 0.438 |
| FoldExplorer | 0.415 | 0.441 | 0.419 | 0.456 | 0.425 |
| BLAST | 0.431 | 0.441 | 0.403 | 0.443 | 0.406 |
| Diamond | 0.385 | 0.403 | 0.373 | 0.394 | 0.388 |
| jackhmmer | 0.431 | 0.436 | 0.413 | 0.424 | 0.395 |
| MMseqs | 0.426 | 0.434 | 0.398 | 0.449 | 0.399 |
| Random | 0.365 | 0.381 | 0.354 | 0.387 | 0.379 |
| Best | 0.823 | 0.831 | 0.823 | 0.849 | 0.831 |

**Table S5.** Mean GO semantic similarity of the top-10 retrieved hits across AlphaFold predicted structures stratified by pLDDT confidence levels, corresponding to Figure 6.

| Method | ≥90 | 70~90 | <70 |
| --- | --- | --- | --- |
| GTalign | 0.47 | 0.413 | 0.299 |
| TMalign | 0.468 | 0.41 | 0.299 |
| Dali | 0.516 | 0.488 | 0.398 |
| Foldseek | 0.51 | 0.504 | 0.475 |
| GraSR | 0.462 | 0.389 | 0.357 |
| TMvec | 0.527 | 0.524 | 0.492 |
| PLMSearch | 0.517 | 0.474 | 0.483 |
| DHR | 0.554 | 0.54 | 0.525 |
| FoldExplorer | 0.552 | 0.513 | 0.504 |
| BLAST | 0.405 | 0.391 | 0.445 |
| Diamond | 0.254 | 0.248 | 0.311 |
| jackhmmer | 0.438 | 0.405 | 0.451 |
| MMseqs | 0.347 | 0.35 | 0.415 |

**Supplementary Figures**


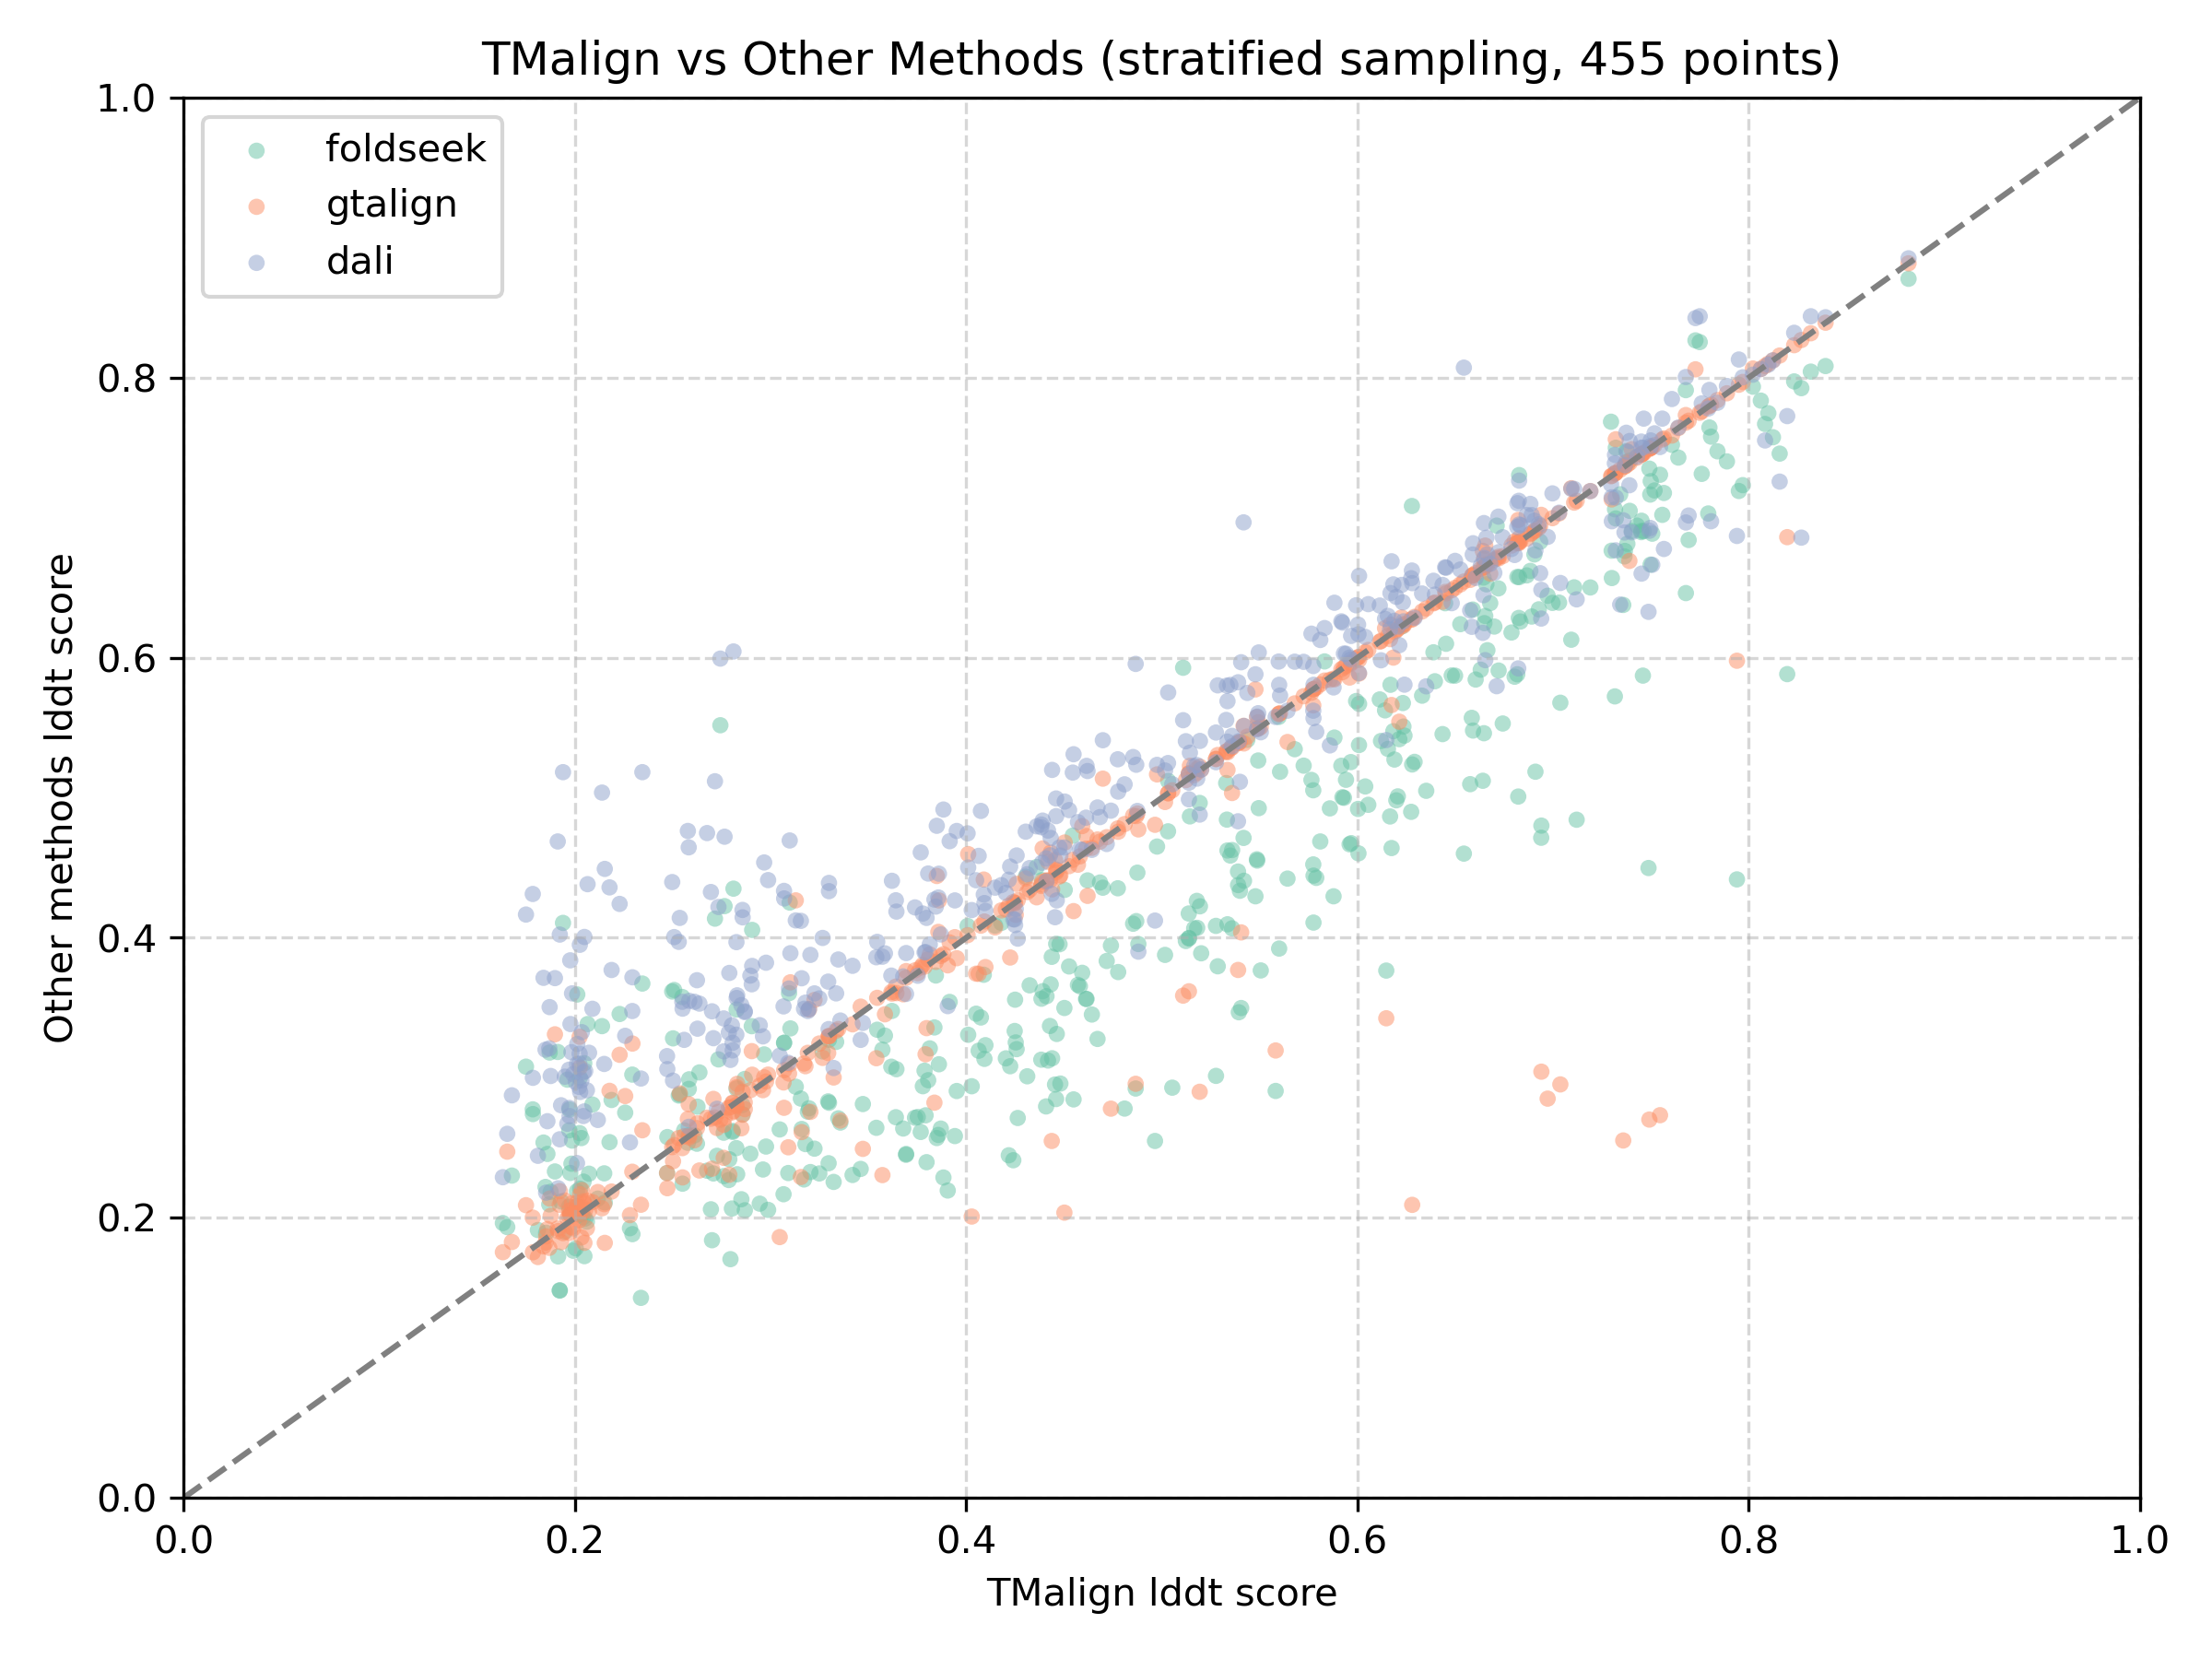


**Figure S1. Pairwise comparison of residue-level alignment quality using lDDT.** A total of 455 query-hit alignments were selected by stratified sampling over lDDT ranges. Each point represents one alignment. The x-axis shows the lDDT score obtained by TM-align, while the y-axis shows the corresponding lDDT score obtained by the other alignment methods (Dali, GTalign, and Foldseek). The diagonal line indicates y = x.


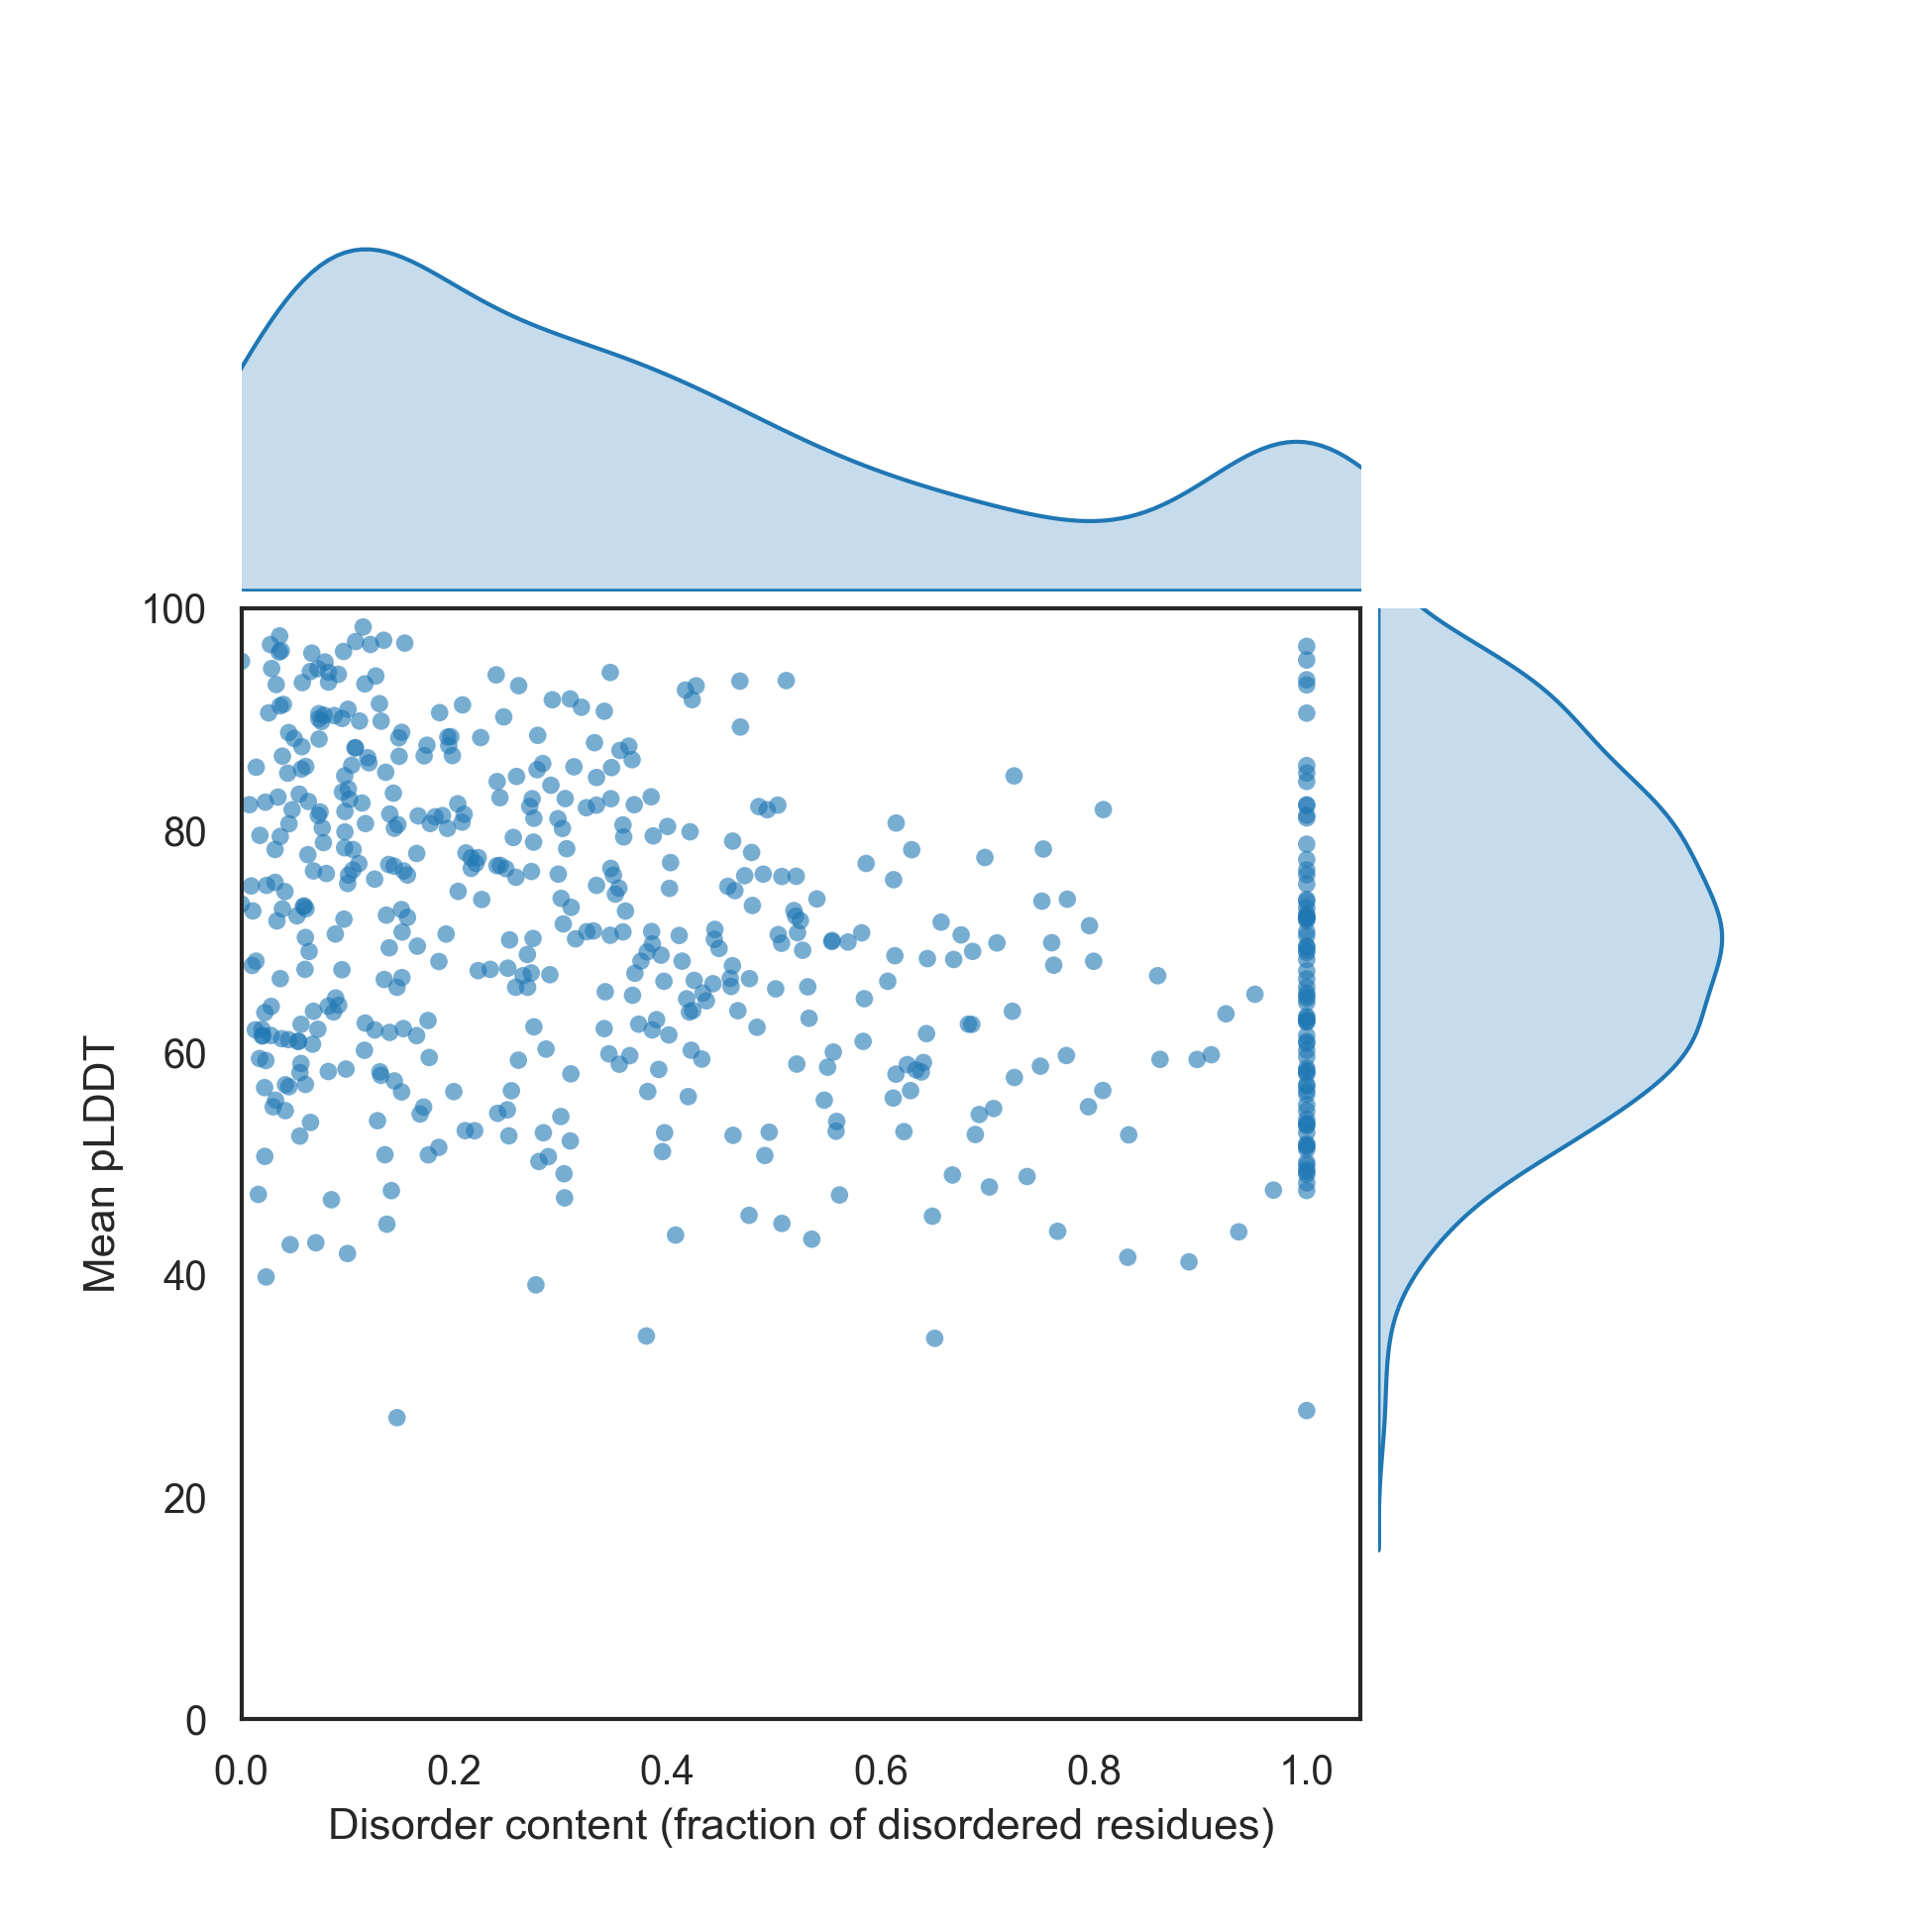


**Figure S2. Distribution of intrinsic disorder content and predicted structure confidence for the DisProt benchmark dataset.** Each point represents one protein, plotted by disorder content (x-axis) and mean pLDDT (y-axis). Marginal density estimates illustrate the overall distributions of disorder content and pLDDT scores, highlighting the prevalence of low-confidence predictions among highly disordered proteins.
